RESEARCH ARTICLE

# Isolation and characterization of the *TaSnRK2.10* gene and its association with agronomic traits in wheat (*Triticum aestivum* L.)

Zhao-Gui Zhang<sup>1</sup>✉, Guang-de Lv<sup>1,2</sup>✉, Bing Li<sup>1</sup>, Jia-Jia Wang<sup>1</sup>, Yan Zhao<sup>1</sup>, Fan-Mei Kong<sup>1</sup>, Ying Guo<sup>1\*</sup>, Si-Shen Li<sup>1\*</sup>

**1** State Key Laboratory of Crop Biology/Shandong Key Laboratory of Crop Biology, Shandong Agricultural University, Tai'an, China, **2** Tai'an Academy of Agricultural Science, Tai'an, China

✉ These authors contributed equally to this work.

\* [ssli@sdau.edu.cn](mailto:ssli@sdau.edu.cn) (SSL); [guoying729@126.com](mailto:guoying729@126.com) (YG)

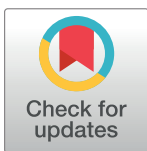

## Abstract

Sucrose non-fermenting 1-related protein kinases (SnRKs) comprise a major family of signaling genes in plants and are associated with metabolic regulation, nutrient utilization and stress responses. This gene family has been proposed to be involved in sucrose signaling. In the present study, we cloned three copies of the *TaSnRK2.10* gene from bread wheat on chromosomes 4A, 4B and 4D. The coding sequence (CDS) is 1086 bp in length and encodes a protein of 361 amino acids that exhibits functional domains shared with SnRK2s. Based on the haplotypes of *TaSnRK2.10-4A* (Hap-4A-H and Hap-4A-L), a cleaved amplified polymorphic sequence (CAPS) marker designated *TaSnRK2.10-4A-CAPS* was developed and mapped between the markers *D-1092101* and *D-100014232* using a set of recombinant inbred lines (RILs). The *TaSnRK2.10-4B* alleles (Hap-4B-G and Hap-4B-A) were transformed into allele-specific PCR (AS-PCR) markers *TaSnRK2.10-4B-AS1* and *TaSnRK2.10-4B-AS2*, which were located between the markers *D-1281577* and *S-1862758*. No diversity was found for *TaSnRK2.10-4D*. An association analysis using a natural population consisting of 128 winter wheat varieties in multiple environments showed that the thousand grain weight (TGW) and spike length (SL) of Hap-4A-H were significantly higher than those of Hap-4A-L, but plant height (PH) was significantly lower.

## OPEN ACCESS

**Citation:** Zhang Z-G, Lv G-d, Li B, Wang J-J, Zhao Y, Kong F-M, et al. (2017) Isolation and characterization of the *TaSnRK2.10* gene and its association with agronomic traits in wheat (*Triticum aestivum* L.). PLoS ONE 12(3): e0174425. <https://doi.org/10.1371/journal.pone.0174425>

**Editor:** Pilar Hernandez, Instituto Agricultura Sostenible, SPAIN

**Received:** December 11, 2016

**Accepted:** March 8, 2017

**Published:** March 29, 2017

**Copyright:** © 2017 Zhang et al. This is an open access article distributed under the terms of the [Creative Commons Attribution License](https://creativecommons.org/licenses/by/4.0/), which permits unrestricted use, distribution, and reproduction in any medium, provided the original author and source are credited.

**Data Availability Statement:** All relevant data are within the paper and its Supporting Information file.

**Funding:** Support was provided by The National Natural Science Foundation of China (Grant No. 31271712), the Natural Science Foundation of Shandong Province, China (Grant No. ZR2010CZ003), and the Improved Agricultural Variety Project of Shandong Province, China.

## Introduction

Wheat (*Triticum aestivum* L.) is one of the most important food crops worldwide, and obtaining higher yields is one of the primary objectives for wheat improvement. A large number of quantitative trait loci (QTLs) have been reported to control grain yield and yield components [1–7]. Recently, several yield-related genes have been cloned and transformed into functional markers (FMs), such as *TaGW2* [8], *TaSus2* [9], *TaCwi-A1* [10], and *TaGS1a* [11] etc. The FMs derived from polymorphic sites in genes are important for marker-assisted selection (MAS) in breeding programs [12].

Sucrose non-fermenting 1-related protein kinases (SnRKs) form a major family of signaling proteins in plants and include three gene subfamilies, *SnRK1*, *SnRK2* and *SnRK3* [13]. *SnRK1*

**Competing interests:** The authors have declared that no competing interests exist.

genes play an important role in the regulation of carbon metabolism and energy status [14–15], and *SnRK3* genes encode CBL-interacting protein kinases, which specifically interact with calcineurin B-like proteins (CBLs) [16]. The *SnRK2* genes represent a group of plant-specific protein kinases that have been shown to be involved in abiotic stress signal transduction, nutrient utilization and growth in plants [17]. Ten members of the *SnRK2* gene family have been identified [15].

In wheat, *SnRK2s* are involved in the response to abiotic stress and have potential functions in carbohydrate and energy metabolism [18]. *PKABA1* was the first gene of the *SnRK2* family cloned in wheat and is induced by abscisic acid (ABA) and hyperosmotic stress [19–20]. Overexpression of *TaSnRK2.4* in *Arabidopsis* resulted in increased tolerance to osmotic stress, delayed seedling establishment, longer primary roots, and higher yields under both normal and stress conditions [21]. Functional analysis showed that *TaSnRK2.7* is involved in carbohydrate metabolism as well as decreasing osmotic potential, enhancing photosystem II activity, and promoting root growth [18]. *TaSnRK2.8* may participate in ABA-dependent signal transduction pathways, and overexpression of this gene results in enhanced tolerance to abiotic stress. Additionally, *TaSnRK2.8* transgenic plants show significantly lower levels of total soluble sugar under normal growing conditions, which suggests that this gene might be involved in carbohydrate metabolism [22]. Two other members of the *SnRK2s* found in wheat, *TaSnRK2.3* and *W55a*, also play important roles in the response to abiotic stress and plant growth [7, 23].

The objectives of this study were to isolate the full-length cDNA and gDNA sequences of *TaSnRK2.10* in wheat, to develop and map the functional markers, and to conduct an association analysis between *TaSnRK2.10* haplotypes and agronomic traits using a natural population of 128 varieties.

## Materials and methods

### Plant materials

Plant materials in this study came from four groups: 1) ten winter wheat varieties, including Chinese Spring, Jinan 17, Jining 17, Lumai 21, Lumai 23, Shannong 0431, Shannong 8355, Weimai 8, Xiaoyan 81, and Yannong 15, were used for the isolation of *TaSnRK2.10* DNA sequences and for haplotype analysis. This material was highly polymorphic and was selected from each subgroup of the 128 natural populations of varieties (NPVs) analysed using 91 SSR and 47 functional markers; 2) a set of Chinese Spring nullisomic-tetrasomic lines (CS-N/Ts) was used for determining the special chromosomes of *TaSnRK2.10*; 3) a set of 179 recombinant inbred lines (RILs) derived from ‘Shannong 0431 × Lumai 21’ was employed for linkage analysis. Shannong 0431 is a germplasm developed by our group with a large grain size and multi-disease resistance (wheat stripe rust, leaf rust, powdery mildew and sharp eyespot), Lumai 21 is a cultivar released by the Yantai Academy of Agricultural Science of China in 1996 and has a high yield and high drought resistance; and 4) a natural population of varieties (NPVs) was employed to validate the functional markers and analyze the relationships between *TaSnRK2.10* haplotypes and agronomic traits. The population consisted of 128 winter wheat varieties released in the Huang-huai Winter Wheat Region and the Northern Winter Wheat Region of China.

### DNA and RNA extraction and first-strand reverse transcription of cDNA

After sterilization for 5 min in a 10% solution of H<sub>2</sub>O<sub>2</sub> and washing three times with sterilized water, wheat seeds were germinated and cultured in a growth chamber (20±1 °C with 12 h light, 12 h dark cycle). Ten days later, wheat leaves were sampled for the isolation of gDNA and total RNA. The gDNA was extracted from lyophilized mixed leaves using the CTAB method [24]. The RNA was extracted using TRIzol reagent (Invitrogen Co., Ltd., Shanghai,

China), and the first-strand synthesis was performed using M-MLV transcriptase (Invitrogen Co., Ltd., Shanghai, China) according to the manufacturer's instructions.

### Cloning, sequence analysis and development of genome-specific primers

To obtain the sequence of *TaSnRK2.10*, the cDNA sequence of *SAPK10* from rice (GenBank ID: AB125311) was used as a query sequence to screen the GenBank wheat EST database. All candidate ESTs showing high similarity to *SAPK10* cDNA were obtained through BLASTN searches (<http://www.ncbi.nlm.nih.gov>) and assembled into a putative *TaSnRK2.10* cDNA sequence using the CAP3 Sequence Assembly Program (<http://doua.prabi.fr/software/cap3>). The functional region and activity sites were identified with PROSITE (<http://prosite.expasy.org/>). The primer pairs for *TaSnRK2.10-1F/R* and *TaSnRK2.10-2F/R* (Table 1) were designed based on the putative sequence using Primer Premier Version 5.0 software (<http://www.premierbiosoft.com/>) and were used for isolating the cDNA and gDNA sequences of *TaSnRK2.10*. The genome-specific primer pairs for *TaSnRK2.10-3-4AF/R*, *TaSnRK2.10-3-4BF/R* and *TaSnRK2.10-3-4DF/R* (Table 1) were designed based on DNA sequence variations among the genomic sequences to identify homoeologs as well as specific alleles at individual loci.

PCR assays were performed using LA Taq polymerase (TaKaRa Biotechnology Co., Ltd., Dalian, China) in a 20 µL reaction mixture containing 80 ng of gDNA or cDNA, 5 pM of *TaSnRK2.10-1F/R* or *TaSnRK2.10-2F/R*, 200 µM of each dNTP, 1 unit of LA Taq and 2 µL of 10× PCR buffer. A touchdown PCR procedure was employed as follows: initial denaturation at 95°C for 5 min, followed by 10 amplification cycles of 35 s at 95°C, 35 s at 63°C with a decrease of 0.5°C per cycle and 2 min at 72°C, followed by 30 amplification cycles of 30 s at 95°C, 45 s at 59°C and 2 min at 72°C, and a final extension step at 72°C for 10 min. The PCR products were separated on 1.0% agarose gels, and the target bands were recovered with the TIANgel Midi Purification kit (TianGen Biotech Co., Ltd., Beijing, China) and cloned into the pEASY-T1 simple vector (TransGen Biotech Co., Ltd., Beijing, China) before being transformed into competent *E. coli DH5α* cells via the heat shock method. Positive clones were selected for sequencing by Sangon Biotechnology Co. Ltd. (Shanghai, China). Using the software DNA-MAN (<http://www.lynnon.com/>), the positions of exons and introns in the *TaSnRK2.10* gene

**Table 1. Primers used in this study.**

| Primer set         | Primer sequence (5'-3')            | Amplified target       | Size (bp)                   |
|--------------------|------------------------------------|------------------------|-----------------------------|
| TaSnRK2.10-1       | Forward: GCTTGCTCGGTTGCTTTGC       | <i>TaSnRK2.10</i> cDNA | 1339, 1342, and 1284        |
|                    | Reverse: CATCCAAAAGGCCAAACCGT      |                        |                             |
| TaSnRK2.10-2       | Forward: GTCAAGTACATCGAGCGAGGG     | <i>TaSnRK2.10</i> gDNA | 2127 or 2130, 2052 and 2076 |
|                    | Reverse: GTCGGCTCTGAATCAAGGT       |                        |                             |
| TaSnRK2.10-3-4A    | Forward: CTTCAATTCGCAACCAAAATCTACG | A genome-specific      | 1109 or 1106                |
|                    | Reverse: GAACTGGTTGATCCGAGAACCG    |                        |                             |
| TaSnRK2.10-3-4B    | Forward: GCTTGCTTCACTGTCGCAG       | B genome-specific      | 688                         |
|                    | Reverse: GCAGAGTCTAGCAGTACCGTT     |                        |                             |
| TaSnRK2.10-3-4D    | Forward: CCATGACGTTCTCCGTTCCC      | D genome-specific      | 1296                        |
|                    | Reverse: GCACACTCAATATCCTCTGGC     |                        |                             |
| TaSnRK2.10-4A-CAPS | Forward: CTTCAATTCGCAACCAAAATCTACG |                        | 1109 or 1106                |
|                    | Reverse: GAACTGGTTGATCCGAGAACCG    |                        |                             |
| TaSnRK2.10-4B-AS1  | Forward: GCTTGCTTCACTGTCGCAGG      |                        | 688                         |
|                    | Reverse: GCAGAGTCTAGCAGTACCGTT     |                        |                             |
| TaSnRK2.10-4B-AS2  | Forward: GCTTGCTTCACTGTCGCAGA      |                        | 688                         |
|                    | Reverse: GCAGAGTCTAGCAGTACCGTT     |                        |                             |

<https://doi.org/10.1371/journal.pone.0174425.t001>

were determined by aligning the amplified gDNA and the corresponding cDNA sequences. The sequence alignment and similarity to other species were determined using the NCBI database. A phylogenetic tree was constructed based on the full-length amino acid sequences of SnRK2s using the protein sequences aligned by MAFFT7 [25]. The maximum-likelihood phylogenetic tree was reconstructed using MEGA5 [26], and the phylogenetic support for each split was evaluated with 500 bootstrap replicates.

## Development and location of functional markers

We analysed the sequence of the coding region for gene *TaSnRK2.10* in the ten winter wheat varieties and found two haplotypes for *TaSnRK2.10-4A* and *TaSnRK2.10-4B*, respectively. Using the Primer Premier 5.0 software, the polymorphic site for distinguishing the haplotypes of the *TaSnRK2.10* gene were transformed into a cleaved amplified polymorphism sequence (CAPS) and allele-specific PCR (AS-PCR) markers [27] for *TaSnRK2.10-4A-CAPS* and *TaSnRK2.10-4B-AS1/AS2* (Table 1), respectively. The primer pairs were used to amplify the genome-specific *TaSnRK2.10* allele of CS-N/Ts, RILs and NPVs through PCR. PCR was performed using the following program: 95°C for 5 min, followed by 30 cycles of 95°C for 30 s, 60°C for 30 s, and 72°C for 1 min, and then a final extension of 72°C for 10 min. The PCR products for the CAPS marker were digested with *SalI* (TaKaRa Biotechnology Co., Ltd., Dalian, China) according to the manufacturer's directions. All segments were separated on 1.0% agarose gels with EB. For location of the functional markers a genetic map of RILs was used which was constructed using SSR markers and DArT array of Wheat PstI (TaqI) 2.6 and Wheat GBS 1.0 (Triticarte Pty. Ltd, Canberra, Australia) (Unpublished data).

## Measurements of agronomic traits and association analysis

The phenotypes of the natural population of 128 wheat varieties were evaluated in field trials in three environments: Tai'an 2011 (TA11), Tai'an 2012 (TA12) and Yan'tai 2012 (YT12), in Shandong Province, China. Tai'an is part of the Huang-Huai Winter Wheat Region and Yantai is part of the Northern Winter Wheat Region of China. Each plot consisted of 3 rows that were 1.5 m long and spaced 25 cm apart; 70 seeds were planted in each row with two replicates. Plant height (PH), grain number per spike (GNS), spike length per plant (SL), sterile spikelet number per spike (SSS), fertile spikelet number per spike (FSS) and total spikelet number per spike (TSS) were determined from 10 random spikes for each line in each replicate at the grain-filling stage. The fertile spikelet number per spike (FSS) was calculated as TSS minus SSS. A 50 cm uniformed row was chosen to measure the spike number per plant (SN). The thousand grain weight (TGW) was evaluated by weighing three samples of 200 grains from each plot after harvest.

The unified mixed linear model (MLM) based on the Q + K model was used for functional markers and agronomic traits analysis in TASSEL v.2.0.1 [28–29]. The population structure matrix (Q) was obtained using STRUCTURE 2.3.1 software [30]. The relative kinship matrix (K) was obtained using TASSEL software [31]. Corrections for multiple testing were performed using the positive FDR (FDR ≤ 0.1) in QVALUE [32]. The 91 SSR and 47 functional markers were used to calculate Q and K for NPVs. A connection between functional markers and agronomic traits was determined when  $P \leq 0.05$ .

## Results

### Cloning, chromosome assignment and characterization of *TaSnRK2.10*

Four wheat ESTs (CJ827375, CD882003, CD918384 and BJ294918) similar to the cDNA sequence of *SAPK10* were selected and assembled into a putative *TaSnRK2.10* cDNA sequence.

Three cDNA clones were amplified with the *TaSnRK2.10-1F/R* primer pair, and the corresponding gDNA sequences were amplified with the *TaSnRK2.10-2F/R* primer pair (S1–S3 Figs). Based on the three genome-specific primer pairs, *TaSnRK2.10* genes were found to be located on chromosomes 4A, 4B and 4D using the CS-N/Ts (S4 Fig). The sequence of *TaSnRK2.10* is shared high sequence similarity with the currently most updated gene model in Chinese Spring ([http://plants.ensembl.org/Triticum\\_aestivum/Gene](http://plants.ensembl.org/Triticum_aestivum/Gene)), including the uniformity of 99% for *TaSnRK2.10-4A* with TRIAE\_CS42\_4AL\_TGACv1\_291776\_AA0996560, 100% for *TaSnRK2.10-4B* with TRIAE\_CS42\_4BS\_TGACv1\_328137\_AA1083460, and 99% for *TaSnRK2.10-4D* with TRIAE\_CS42\_4DS\_TGACv1\_361281\_AA1164930.

The cDNA sequences of *TaSnRK2.10-4A*, *TaSnRK2.10-4B* and *TaSnRK2.10-4D* amplified with the *TaSnRK2.10-1F/R* primer pair are 1339, 1342 and 1284 bp in length, respectively. Each cDNA sequence of *TaSnRK2.10* on 4A, 4B and 4D contained an open reading frame (ORF) of 1086 bp through ORF finder (<https://www.ncbi.nlm.nih.gov/orffinder/>) which was predicted to encode a protein of 361 amino acid residues (AARs) (Fig 1) with a molecular mass of ~40.6 kDa and a pI of ~4.80. PROSITE analysis indicated that the amino acid sequence contains two conserved domains. The first conserved domain is an N-terminal catalytic domain (23–279 downstream of the Met) containing an ATP-binding site (29–52 downstream of the Met) and a serine/threonine protein kinase active site (138–150 downstream of the Met) (Fig 1). The second domain is a relatively short C-terminal domain with abundant Asp (D) residues. The amino acid sequence of *TaSnRK2.10* shared high sequence similarity with counterpart monocot SnRK2s, including 95.6% with SAPK10 from rice and 94.2% with ZmSnRK2.10 from maize, and lower sequence similarity with dicotyledonous plants, including 62.5% with AtSnRK2.10 from *Arabidopsis*. The phylogenetic tree of the *TaSnRK2.10* and SnRK2 family members from *Arabidopsis*, rice and maize showed that *TaSnRK2.10* clustered in the same clade as OsSAPK10 and ZmSnRK2.10 (S5 Fig).

The complete gDNA sequences (from the ATG start codon to the TGA stop codon) of *TaSnRK2.10-4A*, *TaSnRK2.10-4B* and *TaSnRK2.10-4D* are 2322, 2244 and 2268 bp in length,

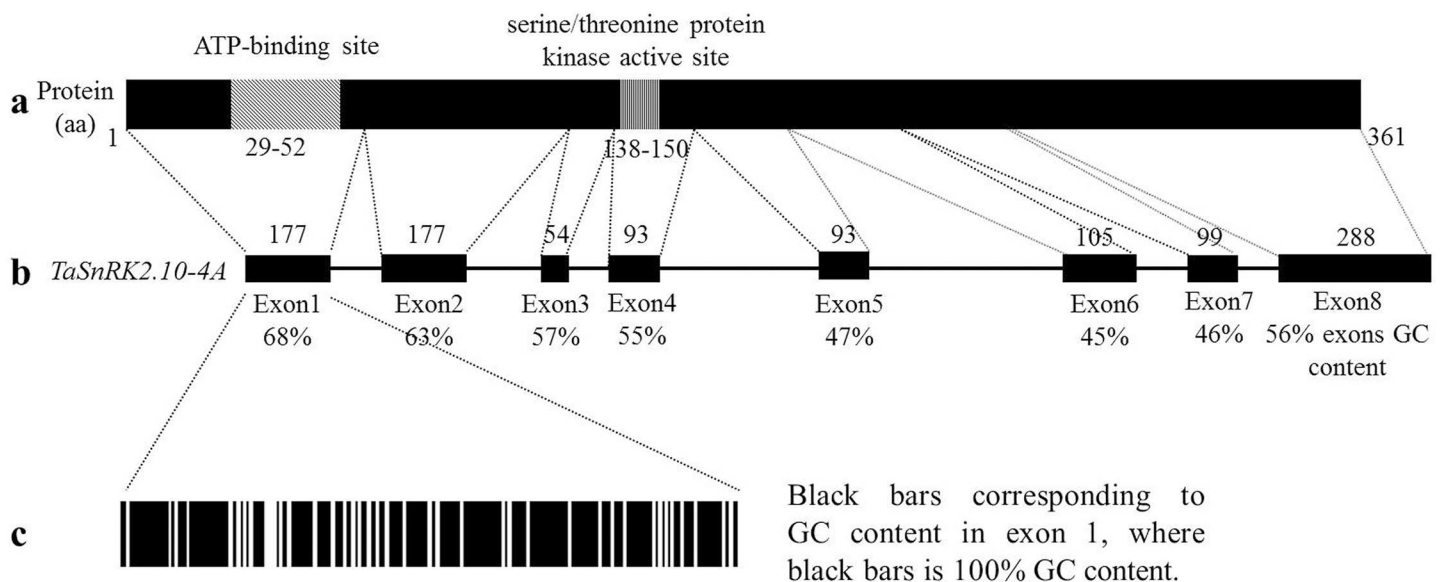

**Fig 1. Schematic diagram of the *TaSnRK2.10* gene.** (a) Known functional domains of *TaSnRK2.10* protein are highlighted; ATP-binding site in diagonal stripes, serine/threonine protein kinase active site in vertical stripes. Amino acid positions of functional domains are indicated below the protein structure. (b) Exon-intron structure of *TaSnRK2.10-4A* gene with its eight coding exons in black boxes; the number of base pair sequence of ORF is listed above each exon; The percentage of GC content for exon 1–8 is indicated below each exon. (c) The GC content in exon 1.

<https://doi.org/10.1371/journal.pone.0174425.g001>



respectively (S1–S3 Figs), with eight exons and seven introns (Fig 2). The exon-intron structure of *TaSnRK2.10* is very similar to *SnRK2.10* in maize and *Arabidopsis*, while the *SAPK10* gene of rice comprises seven exons and six introns. Compared with rice, the first exon of *OsSAPK10* could be divided into the first and second exon in *TaSnRK2.10* (Fig 2), but the sizes of the other exons are similar between wheat and rice, showing high sequence identity even though the introns exhibit low sequence similarity.

### Development and mapping of the functional markers

For the *TaSnRK2.10* gDNA sequences among the ten wheat varieties, three SNPs (single nucleotide polymorphisms) and one indel (insertion or deletion of DNA bases) were found for *TaSnRK2.10-4A* with two haplotypes (named Hap-4A-H and Hap-4A-L). The SNPs were located at 1273, 1471, and 1907 bp downstream of the ATG with corresponding C-T, A-T, and G-C substitutions, respectively. The indel was 3 bp (TGA, 1982–1984 bp downstream of the ATG) (S1 Fig). For *TaSnRK2.10-4B*, one SNP was located at 856 bp downstream of the ATG with A-G substitution, and formed two haplotypes (named Hap-4B-A and Hap-4B-G) (S2 Fig). No variation in *TaSnRK2.10-4D* was observed.

The sequence variations of *TaSnRK2.10-4A* produced a restriction enzyme *SalI* recognition site (GTCGAC) in Hap-4A-H at SNP-1907-C, but not in Hap-4A-L at SNP-1907-G (GTCGAG) (Fig 3A and 3B). Based on this SNP, a CAPS marker *TaSnRK2.10-4A-CAPS* (Table 1) was developed to distinguish the *TaSnRK2.10-4A* allele. The PCR product for Hap-4A-H was digested by *SalI* into two segments of 793 and 316 bp (Fig 3C). The RILs were genotyped using *TaSnRK2.10-4A-CAPS*, and the mapping result using RILs showed that it had highly linked two Diversity Arrays Technology (DArT) markers, *D-1092101* and *D-100014232*, with 0.80 and 0.50 cM, respectively (Fig 4).

Two complementary dominant AS-PCR markers were developed for *TaSnRK2.10-4B* (Table 1). The primer pair *TaSnRK2.10-4B-AS1F/R* yielded a 688 bp PCR fragment for Hap-4B-G, but no PCR fragment for the Hap-4B-A allele. The primer pair *TaSnRK2.10-4B-AS2F/R* yielded a 688 bp fragment for Hap-4B-A, but no PCR fragment for the Hap-4B-G allele (Fig 5). The mapping result using RILs showed that *TaSnRK2.10-4B-AS1/2* was highly linked to the DArT marker *D-1281577* and the SNP marker *S-1862758* with 0.10 and 0.10 cM, respectively (Fig 4).

### Association between haplotypes and agricultural traits

Data on agricultural traits for the natural population of 128 wheat varieties were used in an association analysis. Using the *TaSnRK2.10-4A-CAPS* marker, 63 varieties harboring the Hap-

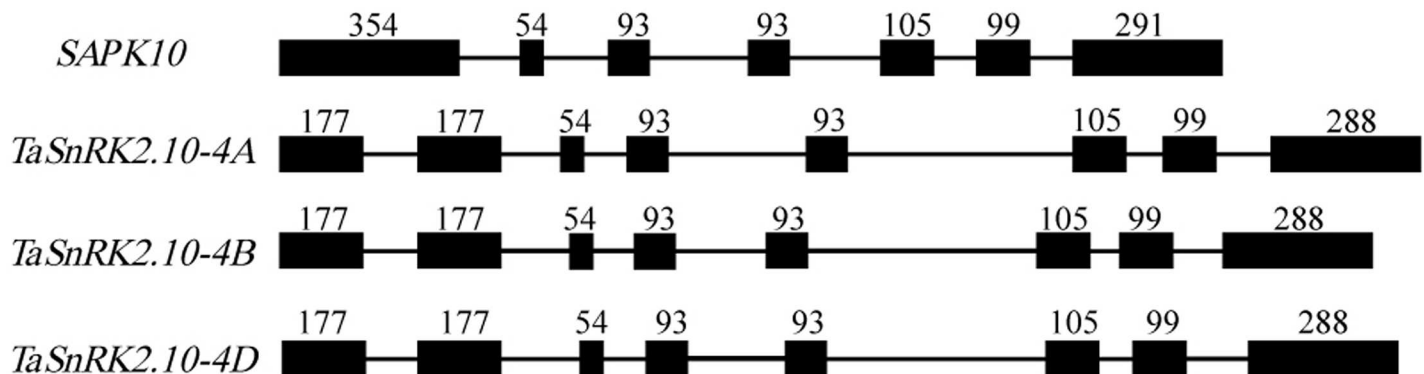

**Fig 2. The structures of the *TaSnRK2.10* gene from 4A, 4B and 4D homoeologs in wheat.** The black boxes denote exons, and the lines between exons represent introns. The numbers upon exons indicate their size (bp).

<https://doi.org/10.1371/journal.pone.0174425.g002>

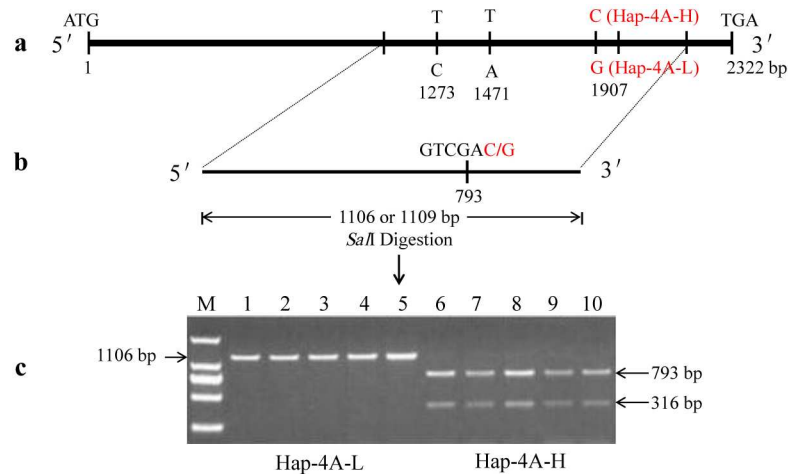

**Fig 3. Functional marker development based on a SNP found in the seventh exon of *TaSnRK2.10-4A*.** (a) The positions of the Hap-4A-H and Hap-4A-L SNPs in *TaSnRK2.10-4A*. (b) SNP1907 (C-G) in the PCR product permitted the generation of different *SalI* restriction fragments with lengths of 793 and 316 bp in the varieties harboring Hap-4A-H, while no digestion product was obtained in Hap-4A-L. (c) Validation of CAPS in varieties with Hap-4A-L (1–5) and Hap-4A-H (6–10) on 1.0% agarose gel. M, marker; 1–5 are the varieties Lumai 21, Jinan 17, Yannong 15, Chinese Spring, and Xiaoyan 81, respectively; and 6–10 are the varieties Shannong 0431, Jining 17, Shannong 8355, Lumai 23 and Weimai 8, respectively.

<https://doi.org/10.1371/journal.pone.0174425.g003>

4A-H haplotype and 65 varieties with the Hap-4A-L haplotype were identified. The TGW of Hap-4A-H was significantly higher than Hap-4A-L in all three environments as well as the average value (AV) at the  $p < 0.01$  level. The PH of Hap-4A-L was significantly higher than Hap-4A-H in TA11, YT12 and the AV ( $p \leq 0.05$ ), but SL was lower for TA11, TA12 and the AV ( $p \leq 0.05$ ). The TSS of Hap-4A-H was significantly higher for TA12 and the AV as well as SSS in the AV ( $p \leq 0.05$ ). These results indicated that the environments are important in explaining the overall phenotypic variations. Using *TaSnRK2.10-4B-AS1* and *TaSnRK2.10-4B-AS2* markers, 93 varieties with Hap-4B-G haplotypes and 35 varieties with Hap-4B-A haplotypes were identified. However, there were no significant differences between the haplotypes except for TGW in TA11 ( $p = 0.025$ ) (Table 2).

## Discussion

A major hindrance to PCR amplification of GC-rich templates is the formation of secondary structures such as hairpin loops of single-stranded GC-rich sequences [33–34]. Many approaches have been developed to overcome such problems by adjusting the PCR procedure [34–39]. However, it is also difficult to get GC-rich sequence using the conventional RACE technique. In recent years, a great number of wheat ESTs have been deposited, which makes it possible to clone the full-length sequences with GC-rich sequences in combination ESTs with PCR amplification. In our present study, four EST sequences were found by performing a BLAST search with a reference sequence and were then combined to generate the tentative full-length sequence of *TaSnRK2.10*. The size of *TaSnRK2.10* is in accordance with *SnRK2s* reported previously [18, 22, 40–43].

Based on the protein size and character of the acidic amino acid-enriched C-terminus, the SnRK2 family can be divided into two groups: SnRK2a and SnRK2b [44]. SnRK2a corresponds to the more recently defined subclass I, and SnRK2b includes subclasses II and III [21, 45]. Increasing evidence indicates that SnRK2s from subclass III are involved in the regulation of plant metabolism [46]. As shown in our study, *TaSnRK2.10* was clustered in the subclass III

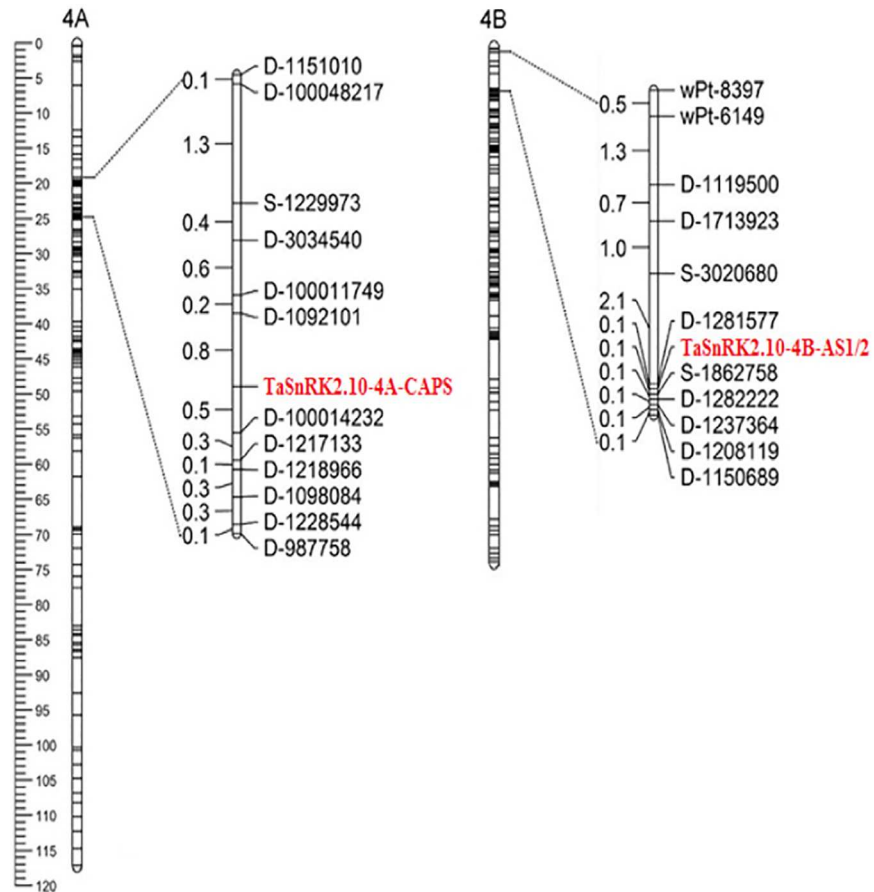

**Fig 4. Mapping of *TaSnRK2.10-4A* and *TaSnRK2.10-4B* based on a RIL population of Shannong 0431 x Lumai 21.**

<https://doi.org/10.1371/journal.pone.0174425.g004>

clade (S5 Fig). The structure of *TaSnRK2.10* is similar to other *SnRK2s*, including two typical domains, an N-terminal highly conserved kinase domain and a regulatory C-terminal domain [46], and showed potential for serine/threonine and tyrosine kinase activities. The relatively short C-terminal domain of *SnRK2.10* is abundant in Asp (D) and might play a role in activation of the kinase [47–49] and function in protein-protein interactions that are mainly involved in ABA responsiveness [40]. In rice and maize, *SnRK2.10* is activated under ABA and hyperosmotic stress. In *Arabidopsis*, *AtSnRK2.10* was found to be expressed in the vascular tissue at the base of developing lateral roots, revealing a role in root growth and architecture [50]. The ortholog in tobacco, *NtOSAK*, has been shown to directly interact with glyceraldehyde-3-phosphate dehydrogenase (GAPDH), linking its mode of action to metabolic processes [51]. All of the above evidence implies that *TaSnRK2.10* is mainly involved in ABA responsiveness and shows a potential role in carbohydrate metabolism. In this study, we found that Hap-4A of *TaSnRK2.10* was associated stably with the TGW, PH and SL, which may indicate new functions of *SnRK2.10* and may be the result of carbohydrate metabolism. The Hap-4A-H varieties of *TaSnRK2.10-4A* showed higher TGW and SL values than the Hap-4A-L varieties, but lower PH values, indicating the Hap-4A-H is a favorable allele for the improvement of grain yield. The marker *TaSnRK2.10-4A-CAPS* may be useful in wheat yield breeding programs.

Exons are the regions encoding proteins in the ORFs of genes. Many studies have indicated that missense mutations can influence the function of genes. For example, Wang et al. [52]



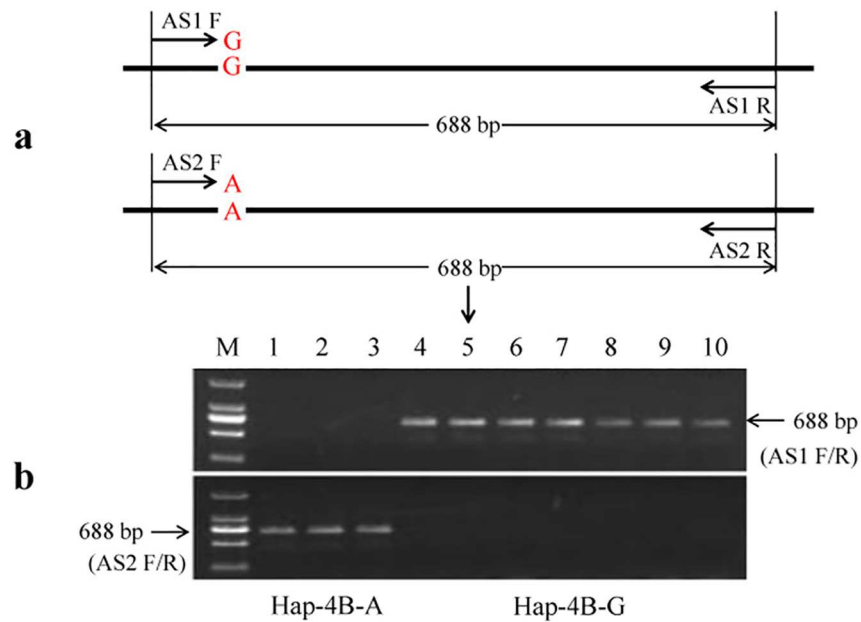

**Fig 5. Functional marker development based on a SNP found in the fourth intron of *TaSnRK2.10-4B*.** (a) Schematic diagram showing the AS-PCR approach used to validate the SNP. (b) PCR fragments amplified with the markers *TaSnRK2.10-4B-AS1* and *TaSnRK2.10-4B-AS2* in ten Chinese wheat varieties. *TaSnRK2.10-4B-AS1* yielded a 688 bp PCR fragment in varieties with the Hap-4B-G allele, and *TaSnRK2.10-4B-AS2* yielded a 688 bp fragment in those with the Hap-4B-A allele. M, marker, 1–3 are the varieties Lumai 21, Jinan 17, Yannong 15, respectively; and 4–10 are the varieties Chinese Spring, and Xiaoyan 81, Shannong 0431, Jining 17, Shannong 8355, Lumai 23 and Weimai 8, respectively.

<https://doi.org/10.1371/journal.pone.0174425.g005>

reported that the mutant *chs1-2* with a nucleotide substitution from G to A displayed defense-associated phenotypes compared with the wild type of *CHS1*, including extensive cell death, the accumulation of hydrogen peroxide and salicylic acid, and an increased expression of PR genes. Wang et al. [53] found a codon change from TGC to TAC in the first exon of *OsCESA7*, and the mutation deleteriously affected cellulose biosynthesis and plant growth. In this study, three SNPs and one indel were found in *TaSnRK2.10-4A* with two haplotypes. Of these, a SNP in the seventh exon in *TaSnRK2.10-4A* caused a missense mutation that resulted in an amino acid change from Asp to His (S1 Fig). The adjacent region is conserved between *TaSnRK2.10* and the ortholog genes *SAPK9* and *SAPK10* in rice [54] (S5 Fig). There has been no report about the change of the function for the amino acid from Asp to His in *SnRK2* gene family. The missense mutation may account for the variance in agronomic traits and this should be affirmed by more evidences in the further. The other SNPs and the indel were located in introns, which may be of little function for agronomic traits. Furthermore, only one SNP was obtained for *TaSnRK2.10-4B* in an intron, and it had no significant association with agronomic traits except for the TGW data in TA11. The potential functions of *TaSnRK2.10-4B* require further investigation for verification.

The wheat yield is affected by many factors and is a polygenic trait influenced by environmental and genetic interactions at all stages of the plant's growth [55]. Direct cloning of yield-related genes in hexaploid wheat was difficult due to its large genome size. In our study, we hypothesized that the *TaSnRK2.10* gene had functions that affect the TGW, PH and SL during the maturity stage. To date, some grain weight genes have been isolated, such as *Ppd-D1* [56], *CKX6-D1* [57], *GS1a* [11], *GW2* [8, 58–59], *GS-D1* [60], *Sus* [9, 61], *GASR7* [62–63], *TEF-7* [64], *CWI* [65], and *1-FEH-w3* [66–67]. Using sequence comparison and the analysis of protein

**Table 2. Association analysis between the haplotypes and agronomic traits.**

| Trait      | ENV  | Hap-4A-H       | Hap-4A-L        | p value | Hap-4B-G       | Hap-4B-A       | p value |
|------------|------|----------------|-----------------|---------|----------------|----------------|---------|
| TGW<br>(g) | TA11 | 53.161 ± 5.505 | 51.189 ± 5.644  | 0.003** | 52.509±5.835   | 51.325±5.098   | 0.025*  |
|            | TA12 | 46.349 ± 5.967 | 43.554 ± 4.881  | 0.007** | 45.342±6.104   | 43.816±3.875   | 0.155   |
|            | YT12 | 47.101 ± 5.140 | 45.373 ± 3.998  | 0.010** | 46.397±4.880   | 45.594±3.978   | 0.190   |
|            | AV   | 48.870 ± 4.989 | 46.705 ± 3.934  | 0.002** | 48.083±4.892   | 46.912±3.684   | 0.051   |
| KNS        | TA11 | 44.661 ± 7.009 | 42.894 ± 5.179  | 0.242   | 43.925±6.271   | 43.243±6.093   | 0.663   |
|            | TA12 | 46.347 ± 7.795 | 44.148 ± 6.025  | 0.427   | 45.513±7.423   | 44.754±5.938   | 0.739   |
|            | YT12 | 59.721 ± 9.037 | 56.657 ± 7.805  | 0.324   | 58.976±8.242   | 56.394±8.902   | 0.469   |
|            | AV   | 50.243 ± 6.740 | 47.900 ± 4.381  | 0.193   | 49.438±5.743   | 48.131±5.835   | 0.911   |
| PH<br>(cm) | TA11 | 64.908 ± 7.136 | 67.194 ± 11.303 | 0.018*  | 66.615±10.529  | 64.721±6.003   | 0.706   |
|            | TA12 | 79.985 ± 7.853 | 80.417 ± 11.612 | 0.220   | 81.292±10.810  | 77.345±6.288   | 0.722   |
|            | YT12 | 70.115 ± 8.763 | 72.936 ± 12.463 | 0.031*  | 72.229±12.212  | 69.766±5.715   | 0.838   |
|            | AV   | 71.669 ± 7.266 | 73.516 ± 11.348 | 0.041*  | 73.378±10.672  | 70.611±5.559   | 0.909   |
| SL<br>(cm) | TA11 | 8.923 ± 1.068  | 8.510 ± 1.062   | 0.014*  | 8.756±1.708    | 8.595±1.111    | 0.344   |
|            | TA12 | 9.036 ± 1.164  | 8.565 ± 0.971   | 0.020*  | 8.845±1.153    | 8.631±0.898    | 0.638   |
|            | YT12 | 9.322 ± 1.149  | 9.071 ± 1.136   | 0.411   | 9.206±1.191    | 9.183±1.038    | 0.620   |
|            | AV   | 9.094 ± 1.036  | 8.715 ± 0.964   | 0.045*  | 8.936±1.047    | 8.803±0.940    | 0.797   |
| TSS        | TA11 | 19.905 ± 1.489 | 19.364 ± 1.270  | 0.081   | 19.839 ± 1.352 | 19.063 ± 1.425 | 0.066   |
|            | TA12 | 20.946 ± 1.693 | 20.047 ± 1.431  | 0.017*  | 20.709 ± 1.679 | 19.856 ± 1.301 | 0.164   |
|            | YT12 | 19.705 ± 1.331 | 19.383 ± 1.143  | 0.359   | 19.646 ± 1.312 | 19.282 ± 1.020 | 0.397   |
|            | AV   | 20.185 ± 1.352 | 19.598 ± 1.096  | 0.048*  | 20.065 ± 1.292 | 19.401 ± 1.056 | 0.110   |
| FSS        | TA11 | 2.023 ± 0.808  | 2.007 ± 0.858   | 0.769   | 2.218±0.817    | 1.713±0.816    | 0.062   |
|            | TA12 | 2.429 ± 1.204  | 2.305 ± 1.220   | 0.490   | 2.505±1.272    | 1.996±0.957    | 0.085   |
|            | YT12 | 0.457 ± 0.421  | 0.474 ± 0.474   | 0.813   | 0.477±0.465    | 0.424±0.469    | 0.872   |
|            | AV   | 1.636 ± 0.637  | 1.595 ± 0.673   | 0.785   | 1.704±0.646    | 1.378±0.632    | 0.072   |
| SSS        | TA11 | 17.882 ± 1.644 | 17.357 ± 1.135  | 0.068   | 17.711±1.464   | 17.350±1.332   | 0.476   |
|            | TA12 | 18.517 ± 1.768 | 17.742 ± 1.398  | 0.077   | 18.204±1.677   | 17.860±1.497   | 0.961   |
|            | YT12 | 19.248 ± 1.362 | 18.909 ± 1.165  | 0.342   | 19.169±1.364   | 18.859±1.105   | 0.355   |
|            | AV   | 18.549 ± 1.343 | 18.003 ± 0.888  | 0.045*  | 18.362±1.187   | 18.022±1.093   | 0.485   |

The natural population of 128 varieties was grouped according to their *TaSnRK2.10-4A* haplotypes (Hap-4A-H and Hap-4A-L) and *TaSnRK2.10-4B* haplotypes (Hap-4B-G and Hap-4B-A). The presented values are the mean ± SD from the association analysis.

\* and \*\* designate significance differences at  $p \leq 0.05$  and  $p \leq 0.01$ , respectively.

<https://doi.org/10.1371/journal.pone.0174425.t002>

domains with PROSITE (<http://prosite.expasy.org/>), we found that *TaSnRK2.10* is different from these genes and is a new gene for grain weight. More than 20 plant height genes in wheat were detected and only few were cloned. Zhang et al. [68] reported that the *Rht-B1* and *Rht-D1* in the fourth homologous group had functions that affect the TGW and kernel number per spike, but the sequences of them were different from *TaSnRK2.10*. Currently, there has been no report regarding the cloning of a gene that affects the SL. The validation of QTLs provides the critical first step for further mapping and gene cloning. Some QTLs for the TGW, PH and SL were located on chromosomes 4A, 4B and 4D [69–73]. The relationship between the *TaSnRK2.10* and these QTLs requires further study.

## Conclusion

A triplicate set of *TaSnRK2.10* homoeologs was cloned and assigned to chromosomes 4A, 4B and 4D. The corresponding full-length gDNA sequences of *TaSnRK2.10* were 2322, 2244, and 2268 bp, comprising eight exons and seven introns and presenting an ORF of 1086 bp that

encodes a protein of 361 amino acids with functional domains shared with SnRK2s. One SNP in an exon and two SNPs and one indel in introns were detected in *TaSnRK2.10-4A* alleles, resulting in two haplotypes: Hap-4A-H and Hap-4A-L. In *TaSnRK2.10-4B* alleles, only one SNP in an intron was detected, also resulting in two haplotypes: Hap-4B-G and Hap-4B-A. The sequences of *SnRK2.10-4D* were completely conserved. A CAPS marker for *TaSnRK2.10-4A* and two AS-PCR markers for *TaSnRK2.10-4B* were developed and mapped on chromosomes. The results of an association analysis provided evidence that *TaSnRK2.10-4A* shows an association with TGW in all of the examined environments and with PH and SL in most environments, representing new functions of SnRK2s in wheat. Hap-4A-H was found to be a favorable allele for the improvement of grain yield.

## Supporting information

### **S1 Fig. Genome DNA sequences alignment between two haplotypes of TaSnRK2.10-4A.**

The exons were indicated by the gray shade and the green shaded bases are SNPs and InDels between the two haplotypes.

(RAR)

### **S2 Fig. Genome DNA sequences alignment between two haplotypes of TaSnRK2.10-4B.**

The exons were indicated by the gray shade and the green shaded bases are SNPs between the two haplotypes.

(RAR)

**S3 Fig. Genome DNA sequences alignment of TaSnRK2.10-4D.** The exons were indicated by the gray shade.

(RAR)

**S4 Fig. Chromosomal locations of TaSnRK2.10 homoeologs based on genome-specific primer pairs using Chinese Spring nullisomic-tetrasomic lines.** M, marker; 1, Shannong 0431; 2, Lumai21; 3, N4AT4B (nullisomic 4A-tetrasomic 4B); 4, N4BT4A; 5, N4DT4B; 6, H2O.

(RAR)

**S5 Fig. Phylogenetic tree of TaSnRK2.10 and SnRK2s from Arabidopsis, rice, maize and wheat.** Three distinct isoform groups are presented within the boxes. The phylogenetic tree

was constructed based on the full-length amino acid sequences of SnRK2s using the protein sequences were aligned by MAFFT7 [25]. The Maximum-likelihood phylogenetic tree was reconstructed using MEGA5 [26], and the phylogenetic support for each split was evaluated with 500 bootstrap replicates.

(RAR)

## Acknowledgments

This work was supported by the National Natural Science Foundation of China (Grant No. 31271712), the Natural Science Foundation of Shandong Province, China (Grant No. ZR2010CZ003), and the Improved Agricultural Variety Project of Shandong Province, China.

## Author Contributions

**Conceptualization:** YG SSL.

**Data curation:** BL JJW YZ FMK.

**Formal analysis:** ZGZ.

**Funding acquisition:** SSL.  
**Investigation:** ZGZ.  
**Methodology:** ZGZ.  
**Project administration:** SSL.  
**Resources:** SSL.  
**Software:** ZGZ YZ FMK.  
**Supervision:** SSL.  
**Validation:** ZGZ GdL.  
**Visualization:** ZGZ GdL.  
**Writing – original draft:** ZGZ GdL SSL.  
**Writing – review & editing:** GdL SSL.

## References

1. Huang XQ, Cöster H, Ganal M, Röder MS (2003) Advanced backcross QTL analysis for the identification of quantitative trait loci alleles from wild relatives of wheat (*Triticum aestivum* L.). *Theoretical and Applied Genetics* 106: 1379–1389 <https://doi.org/10.1007/s00122-002-1179-7> PMID: 12750781
2. Quarrie S, Steed A, Calestani C, Semikhodskii A, Lebreton C, Chinoy C, et al. (2005) A high-density genetic map of hexaploid wheat (*Triticum aestivum* L.) from the cross Chinese Spring × SQ1 and its use to compare QTLs for grain yield across a range of environments. *Theoretical and Applied Genetics* 110: 865–880 <https://doi.org/10.1007/s00122-004-1902-7> PMID: 15719212
3. Su JY, Tong YP, Liu QY, Li B, Jing RL, Li JY, et al. (2006) Mapping quantitative trait loci for post-anthesis dry matter accumulation in wheat. *Journal of Integrative Plant Biology* 48: 938–944
4. Bennett D, Reynolds M, Mullan D, Izanloo A, Kuchel H, Langridge P, et al. (2012) Detection of two major grain yield QTL in bread wheat (*Triticum aestivum* L.) under heat, drought and high yield potential environments. *Theoretical and Applied Genetics* 125: 1473–1485 <https://doi.org/10.1007/s00122-012-1927-2> PMID: 22772727
5. Bonneau J, Taylor J, Parent B, Bennett D, Reynolds M, Feuillet C, et al. (2013) Multi-environment analysis and improved mapping of a yield-related QTL on chromosome 3B of wheat. *Theoretical and Applied Genetics* 126: 747–761 <https://doi.org/10.1007/s00122-012-2015-3> PMID: 23262551
6. Rustgi S, Shafqat MN, Kumar N, Baenziger PS, Ali ML, Dweikat I, et al. (2013) Genetic dissection of yield and its component traits using high-density composite map of wheat chromosome 3A: bridging gaps between QTLs and underlying genes. *PLOS ONE* 8: e70526 <https://doi.org/10.1371/journal.pone.0070526> PMID: 23894667
7. Tian SJ, Mao XG, Zhang HY, Chen SS, Zhai CC, Yang SM, et al. (2013) Cloning and characterization of *TaSnRK2.3*, a novel *SnRK2* gene in common wheat. *Journal of Experimental Botany* 64: 2063–2080 <https://doi.org/10.1093/jxb/ert072> PMID: 23630328
8. Su ZQ, Hao CY, Wang LF, Dong YC, Zhang XY (2011) Identification and development of a functional marker of *TaGW2* associated with grain weight in bread wheat (*Triticum aestivum* L.). *Theoretical and Applied Genetics* 122: 211–223 <https://doi.org/10.1007/s00122-010-1437-z> PMID: 20838758
9. Jiang QY, Hou J, Hao CY, Wang LF, Ge HM, Dong YS, et al. (2011) The wheat (*T. aestivum*) sucrose synthase 2 gene (*TaSus2*) active in endosperm development is associated with yield traits. *Functional and Integrative Genomics* 11: 49–61 <https://doi.org/10.1007/s10142-010-0188-x> PMID: 20821031
10. Ma DY, Yan J, He ZH, Xia XC (2012) Characterization of a cell wall invertase gene *TaCwi-A1* on common wheat chromosome 2A and development of functional markers. *Molecular Breeding* 29: 43–52
11. Guo Y, Sun JJ, Zhang GZ, Wang YY, Kong FM, Zhao Y, et al. (2013) Haplotype, molecular marker and phenotype effects associated with mineral nutrient and grain size traits of *TaGS1a* in wheat. *Field Crops Research* 154: 119–125
12. Bagge M, Xia XC, Lübberstedt T (2007) Functional markers in wheat. *Current Opinion in Plant Biology* 10: 211–216 <https://doi.org/10.1016/j.pbi.2007.01.009> PMID: 17292659

13. Hrabak EM, Chan CW, Gribskov M, Harper JF, Choi JH, Halford N, et al. (2003) The *Arabidopsis* CDPK-SnRK superfamily of protein kinases. *Plant Physiology* 132: 666–680 <https://doi.org/10.1104/pp.102.011999> PMID: 12805596
14. Barker JHA, Slocombe SP, Ball KL, Hardie DG, Shewry PR, Halford NG (1996) Evidence that barley 3-hydroxy-3-methylglutaryl-coenzyme a reductase kinase is a member of the sucrose nonfermenting-1-related protein kinase family. *Plant Physiology* 112: 1141–1149 PMID: 8938414
15. Halford NG, Hey S, Jhurrea D, Laurie S, McKibbin RS, Paul M, et al. (2003) Metabolic signalling and carbon partitioning: role of Snf1-related (SnRK1) protein kinase. *Journal of Experimental Botany* 54: 467–475 PMID: 12508057
16. Kim KN, Cheong YH, Gupta R, Luan S (2000) Interaction specificity of *Arabidopsis* calcineurin B-like calcium sensors and their target kinases. *Plant Physiology* 124: 1844–1853 PMID: 11115898
17. Coello P, Hey SJ, Halford NG (2011) The sucrose non-fermenting-1-related (SnRK) family of protein kinases: potential for manipulation to improve stress tolerance and increase yield. *Journal of Experimental Botany* 62: 883–893 <https://doi.org/10.1093/jxb/erq331> PMID: 20974737
18. Zhang HY, Mao XG, Jing RL, Chang XP, Xie HM (2011) Characterization of a common wheat (*Triticum aestivum* L.) *TaSnRK2.7* gene involved in abiotic stress responses. *Journal of Experimental Botany* 62: 975–988 <https://doi.org/10.1093/jxb/erq328> PMID: 21030389
19. Anderberg RJ, Walker-Simmons MK (1992) Isolation of a wheat cDNA clone for an abscisic acid-inducible transcript with homology to protein kinases. *Proceedings of the National Academy of Sciences, USA* 89: 10183–10187
20. Johnson RR, Wagner RL, Verhey SD, Simmons MKW (2002) The abscisic acid-responsive kinase PKABA1 interacts with a seed-specific abscisic acid response element-binding factor, TaABF, and phosphorylates TaABF peptide sequences. *Plant Physiology* 130: 837–846 <https://doi.org/10.1104/pp.001354> PMID: 12376648
21. Mao XG, Zhang HY, Tian SJ, Chang XP, Jing RL (2010) *TaSnRK2.4*, an SNF1-type serine/threonine protein kinase of wheat (*Triticum aestivum* L.), confers enhanced multistress tolerance in *Arabidopsis*. *Journal of Experimental Botany* 61: 683–696 <https://doi.org/10.1093/jxb/erp331> PMID: 20022921
22. Zhang HY, Mao XG, Wang CS (2010) Overexpression of a common wheat gene *TaSnRK2.8* enhances tolerance to drought, salt and low temperature in *Arabidopsis*. *PLOS ONE* 5: e16041 <https://doi.org/10.1371/journal.pone.0016041> PMID: 21209856
23. Xu ZS, Liu L, Ni ZY, Liu P, Chen M, Li LC, et al. (2009) *W55a* encodes a novel protein kinase that is involved in multiple stress responses. *Journal of Integrative Plant Biology* 51: 58–66 <https://doi.org/10.1111/j.1744-7909.2008.00776.x> PMID: 19166495
24. Stein N, Herren G, Keller B (2001) A new DNA extraction method for high-throughput marker analysis in a large-genome species such as *Triticum aestivum*. *Plant Breeding* 120: 354–356
25. Katoh K, Standley DM (2013) MAFFT multiple sequence alignment software version 7: improvements in performance and usability. *Molecular Biology and Evolution* 30:772–780 <https://doi.org/10.1093/molbev/mst010> PMID: 23329690
26. Tamura K, Peterson D, Peterson N, Stecher C, Nei M, Kumar S (2011) MEGA5: molecular evolutionary genetics analysis using maximum likelihood, evolutionary distance, and maximum parsimony methods. *Molecular Biology and Evolution* 28: 2731–2739 <https://doi.org/10.1093/molbev/msr121> PMID: 21546353
27. See D, Kanazin V, Talbert H, Blake T (2000) Electrophoretic detection of single-nucleotide polymorphisms. *Biotechniques* 28: 710–714 PMID: 10769749
28. Yu J, Pressoir G, Briggs WH, Bi I, Yamasaki M, McMullen MD, et al. (2006) A unified mixed-model method for association mapping that accounts for multiple levels of relatedness. *Nature Genetics* 38: 203–208 <https://doi.org/10.1038/ng1702> PMID: 16380716
29. Bradbury PJ, Zhang Z, Kroon DE, Casstevens TM, Ramdoss Y, Buckler ES (2007) TASSEL: software for association mapping of complex traits in diverse samples. *Bioinformatics* 23: 2633–2635 <https://doi.org/10.1093/bioinformatics/btm308> PMID: 17586829
30. Du QZ, Wang BW, Wei ZZ, Zhang DQ, Li BL (2012) Genetic diversity and population structure of Chinese white poplar (*Populus tomentosa*) revealed by SSR markers. *Journal of Heredity* 103: 853–862 <https://doi.org/10.1093/jhered/ess061> PMID: 23008443
31. Ritland K (1996) Estimators for pairwise relatedness and individual inbreeding coefficients. *Genetical Research* 67: 175–185
32. Storey JD, Tibshirani R (2003) Statistical significance for genome wide studies. *Proceeding of the National Academy of Science USA* 100: 9440–9445



33. McDowell DG, Burns NA, Parkes HC (1998) Localised sequence regions possessing high melting temperatures prevent the amplification of a DNA mimic in competitive PCR. *Nucleic Acids Research* 26: 3340–3347 PMID: [9649616](#)
34. Tan MH, Gécz J, Shoubridge C (2013) PCR Amplification and sequence analysis of GC-rich sequences: aristaless-related homeobox example. *Methods in Molecular Biology* 1017: 105–120 [https://doi.org/10.1007/978-1-62703-438-8\\_8](https://doi.org/10.1007/978-1-62703-438-8_8) PMID: [23719911](#)
35. Sarkar G, Kapelner S, Sommer SS (1990) Formamide can dramatically improve the specificity of PCR. *Nucleic Acids Research* 18: 7465 PMID: [2259646](#)
36. Agarwal RK, Perl A (1993) PCR amplification of highly GC-rich DNA template after denaturation by NaOH. *Nucleic Acids Research* 21: 5283–5284 PMID: [8255790](#)
37. Kang J, Lee MS, Gorenstein DG (2005) The enhancement of PCR amplification of a random sequence DNA library by DMSO and betaine: application to in vitro combinatorial selection of aptamers. *Journal Biochem Biophys Methods* 64:147–151
38. Mussoet M, Bocciardi R, Parodi S, Ravazzolo R, Ceccherini L (2006) Betaine, dimethyl sulfoxide, and 7-deaza-dGTP, a powerful mixture for amplification of GC-rich DNA sequences. *Journal of Molecular Diagnostics* 8: 544–550 <https://doi.org/10.2353/jmoldx.2006.060058> PMID: [17065422](#)
39. Frey UH, Bachmann HS, Peters J, Siffert W (2008) PCR-amplification of GC-rich regions: 'slowdown PCR'. *Natural Protocols* 3: 1312–1317
40. Kobayashi Y, Yamamoto S, Minami H, Kagaya Y, Hattori T (2004) Differential activation of the rice sucrose nonfermenting1-related protein kinase 2 family by hyperosmotic stress and abscisic acid. *The Plant Cell* 16: 1163–1177 <https://doi.org/10.1105/tpc.019943> PMID: [15084714](#)
41. Patricia C, Emi H, Sandra J, Hey NM, Eleazar MB, Matin AJP, et al. (2012) Evidence that abscisic acid promotes degradation of SNF1-related protein kinase (SnRK1) in wheat and activation of a putative calcium-dependent SnRK2. *Journal of Experimental Botany* 63: 913–924 <https://doi.org/10.1093/jxb/err320> PMID: [21994172](#)
42. Babatunde B, Zhang XY, Liu CL, Yang ZE, Yang ZR, Wang QH, et al. (2014) Cloning of gossypium hirsutum sucrose non-fermenting 1-related protein kinase 2 gene (*GhSnRK2*) and its overexpression in transgenic arabidopsis escalates drought and low temperature tolerance. *PLOS ONE* 9: e112269 <https://doi.org/10.1371/journal.pone.0112269> PMID: [25393623](#)
43. Han Y, Dang RH, Li JX, Jiang JZ, Zhang N, Jia M, et al. (2015) Sucrose nonfermenting1-related protein kinase 2.6, an ortholog of OPEN STOMATA1, is a negative regulator of strawberry fruit development and ripening. *Plant Physiology* 167: 915–930 <https://doi.org/10.1104/pp.114.251314> PMID: [25609556](#)
44. Halford NG, Hardie DG (1998) SNF1-related protein kinases: global regulators of carbon metabolism in plants?. *Plant Molecular Biology* 37: 735–748 PMID: [9678569](#)
45. Andersen JR, Lübberstedt T (2003) Functional markers in plants. *Trends in Plant Science* 8: 554–560 <https://doi.org/10.1016/j.tplants.2003.09.010> PMID: [14607101](#)
46. Kulik A, Wawer I, Krzywińska E, Bucholc M, Dobrowolska G (2011) SnRK2 protein kinases—key regulators of plant response to abiotic stresses. *OmicS: A Journal of Integrative Biology* 15: 859–872 <https://doi.org/10.1089/omi.2011.0091> PMID: [22136638](#)
47. Harmon AC, Yoo BC, McCaffery C (1994) Pseudosubstrate inhibition of CDPK, a protein kinase with a calmodulin-like domain. *Biochemistry* 33: 7278–7287 PMID: [8003491](#)
48. Harper JF, Huang JF, Lloyd SJ (1994) Genetic identification of an autoinhibitor in CDPK, a protein kinase with a calmodulin-like domain. *Biochemistry* 33: 7267–7277 PMID: [8003490](#)
49. Huang JF, Teyton L, Harper JF (1996) Activation of a Ca<sup>2+</sup>-dependent protein kinase involves intramolecular binding of a calmodulin-like regulatory domain. *Biochemistry* 35: 13222–13230 <https://doi.org/10.1021/bi960498a> PMID: [8855961](#)
50. McLoughlin F, Galvan-Ampudia CS, Julkowska MM, Caarls L, Does DVD, Lauriere C, et al. (2012) The Snf1-related protein kinases SnRK2.4 and SnRK2.10 are involved in maintenance of root system architecture during salt stress. *The Plant Journal* 72: 436–449 <https://doi.org/10.1111/j.1365-313X.2012.05089.x> PMID: [22738204](#)
51. Wawer I, Bucholc M, Astier J, Anielska-Mazur A, Dahan J, Kulik A, et al. (2010) Regulation of Nicotiana tabacum osmotic stress-activated protein kinase and its cellular partner GAPDH by nitric oxide in response to salinity. *Biochemical Journal* 429: 73–83 <https://doi.org/10.1042/BJ20100492> PMID: [20397974](#)
52. Wang YC, Zhang Y, Wang Z, Zhang XY, Yang SH (2013) A missense mutation in CHS1, a TIR-NB protein, induces chilling sensitivity in Arabidopsis. *The Plant Journal* 75: 553–565 <https://doi.org/10.1111/tpj.12232> PMID: [23651299](#)

53. Wang DF, Qin YL, Fang JJ, Yuan SJ, Peng LX, Zhao JF, et al. (2016) A missense mutation in the zinc finger domain of *OsCESA7* deleteriously affects cellulose biosynthesis and plant growth in rice. *PLOS ONE* 11: 1–16
54. Kobayashi Y, Yamamoto S, Minami H, Kagaya Y, Hattori T. (2004) Differential activation of the rice sucrose nonfermenting1-related protein kinase2 family by hyperosmotic stress and abscisic acid. *The Plant Cell*, 16: 1163–1177 <https://doi.org/10.1105/tpc.019943> PMID: 15084714
55. Simmonds J, Scott P, Leverington-Waite M, Turner AS, Brinton J, Korzun V, et al. (2014) Identification and independent validation of a stable yield and thousand grain weight QTL on chromosome 6A of hexaploid wheat (*Triticum aestivum* L.). *BMC Plant Biology* 14:191 <https://doi.org/10.1186/s12870-014-0191-9> PMID: 25034643
56. Beales J, Turner A, Griffiths S, Snape JW, Laurie DA (2007) A pseudo-response regulator is misexpressed in the photoperiod insensitive *Ppd-D1a* mutant of wheat (*Triticum aestivum* L.). *Theoretical and Applied Genetics* 115: 721–733 <https://doi.org/10.1007/s00122-007-0603-4> PMID: 17634915
57. Zhang L, Zhao YL, Gao LF, Zhao GY, Zhou RH, Zhang BS, et al. (2012) *TaCKX6-D1*, the ortholog of rice *OsCKX2*, is associated with grain weight in hexaploid wheat. *New Phytologist* 195: 574–584 <https://doi.org/10.1111/j.1469-8137.2012.04194.x> PMID: 22670578
58. Yang Z, Bai Z, Li X, Wang P, Wu QX, Yang L, et al. (2012) SNP identification and allelic-specific PCR markers development for *TaGW2*, a gene linked to wheat kernel weight. *Theoretical and Applied Genetics* 125: 1057–1068 <https://doi.org/10.1007/s00122-012-1895-6> PMID: 22643902
59. Qin L, Hao CY, Hou J, Wang YQ, Li T, Wang LF, et al. (2014) Homologous haplotypes, expression, genetic effects and geographic distribution of the wheat yield gene *TaGW2*. *BMC Plant Biology* 14:107 <https://doi.org/10.1186/1471-2229-14-107> PMID: 24766773
60. Zhang Y, Liu J, Xia X, He Z (2014) *TaGS-D1*, an ortholog of rice *OsGS3*, is associated with grain weight and grain length in common wheat. *Molecular Breeding* 34: 1097–1107
61. Hou J, Jiang QY, Hao CY, Wang YQ, Zhang HN, Zhang XY (2014) Global selection on sucrose synthase haplotypes during a century of wheat breeding. *Plant Physiology* 164: 1918–1929 <https://doi.org/10.1104/pp.113.232454> PMID: 24402050
62. Dong LL, Wang FM, Liu T, Dong ZY, Li AL, Jing RL, et al. (2014) Natural variation of *TaGASR7-A1* affects grain length in common wheat under multiple cultivation conditions. *Molecular Breeding* 34: 937–947
63. Zhang DD, Wang BN, Zhao JM, Zhao XB, Zhang LQ, Liu DC, et al. (2015) Divergence in homoeolog expression of the grain length-associated gene *GASR7* during wheat allohexaploidization. *The Crop Journal* 3: 1–9
64. Zheng J, Liu H, Wang YQ, Wang LF, Chang XP, Jing RL, et al. (2014) *TEF-7A*, a transcript elongation factor gene, influences yield-related traits in bread wheat (*Triticum aestivum* L.). *Journal of Experimental Botany* 65: 5351–5365 <https://doi.org/10.1093/jxb/eru306> PMID: 25056774
65. Jiang YM, Jiang QY, Hao CY, Hou J, Wang LF, Zhang HN, et al. (2015) A yield-associated gene *TaCWI*, in wheat: its function, selection and evolution in global breeding revealed by haplotype analysis. *Theoretical and Applied Genetics* 128: 131–143 <https://doi.org/10.1007/s00122-014-2417-5> PMID: 25367379
66. Zhang JJ, Dell B, Conocono E, Waters I, Setter T, Apples R (2009) Water deficits in wheat: fructan exohydrolase (1-FEH) mRNA expression and relationship to soluble carbohydrate concentrations in two varieties. *New Phytologist* 181: 843–850 <https://doi.org/10.1111/j.1469-8137.2008.02713.x> PMID: 19140945
67. Zhang JJ, Xu YJ, Chen W, Dell B, Vergauwen R, Biddulph B, et al. (2015) A wheat *1-FEH w3* variant underlies enzyme activity for stem WSC remobilization to grain under drought. *New Phytologist* 205: 293–305 <https://doi.org/10.1111/nph.13030> PMID: 25250511
68. Zhang JJ, Dell B, Biddulph B, Drake F, Walker E, Khan N, et al. (2013) Wild-type alleles of *Rht-B1* and *Rht-D1* as independent determinants of thousand-grain weight and kernel number per spike in wheat. *Molecular Breeding* 32: 771–783
69. Kumar N, Kulwal PL, Balyan HS, Gupta PK (2007) QTL mapping for yield and yield contributing traits in two mapping populations of bread wheat. *Molecular Breeding* 19:163–177
70. Sun X, Wu K, Zhao Y, Kong F, Han G, Jiang HM, et al. (2009) QTL analysis of kernel shape and weight using recombinant inbred lines in wheat. *Euphytica* 165: 615–624
71. Ramya P, Chaubal A, Kulkarni K, Gupta L, Kadoo N, Dhaliwal HS, et al. (2010) QTL mapping of 1000-kernel weight, kernel length, and kernel width in bread wheat (*Triticum aestivum* L.). *Journal of Applied Genetics* 51: 421–429 PMID: 21063060

72. Xu YF, Wang RF, Tong YP, Zhao HT, Xie QE, Liu DC, et al. (2014) Mapping QTLs for yield and nitrogen-related traits in wheat: influence of nitrogen and phosphorus fertilization on QTL expression. *Theoretical and Applied Genetics* 127: 59–72 <https://doi.org/10.1007/s00122-013-2201-y> PMID: 24072207
73. Wu QH, Chen YX, Zhou SH, Fu L, Chen JJ, Xiao Y, et al. (2015) High-density genetic linkage map construction and QTL mapping of grain shape and size in the wheat population Yanda1817× Beinong6. *PLOS ONE* 10: e0118144 <https://doi.org/10.1371/journal.pone.0118144> PMID: 25675376
